# Supplementary material
Source: publisher figshare collection journal article supplement (https://tandf.figshare.com/ndownloader/files/39654631)
Supplement: Supplementary file 1 [file 39654631]

| Supplemental Table 1. Comparison of Odds for Predictive Error Greater than 1 D Between Uveitis Classifications | | | |
| --- | --- | --- | --- |
|  | Intermediate uveitis | Posterior uveitis | Panuveitis |
| Anterior uveitis | 2.18 (0.81, 5.53), p=0.12 | 2.48 (0.65, 7.91), p=0.17 | 2.95 (1.14, 7.43), p=0.027 |
| Intermediate uveitis |  | 1.14 (0.28, 4.12), p=0.85 | 1.36 (0.47, 3.98), p=0.57 |
| Posterior uveitis |  |  | 1.19 (0.34, 4.89), p=0.79 |
| p-value <0.008 was considered significant for a difference in odds  Reported effects and confidence intervals are odds ratios | | | |
